# Supplementary material
Source: publisher site journal article supplement (https://www.dovepress.com/article/109641)
Supplement: Supplementary file 1 [file get_supplementary_file.php]

## Appendix A

### PubMed Search

Search run on June 27<sup>th</sup>, 2014

| Search Query |                                                                                                                                                                                                                                                                                                      | Items Found |
|--------------|------------------------------------------------------------------------------------------------------------------------------------------------------------------------------------------------------------------------------------------------------------------------------------------------------|-------------|
| #1           | Search "alcohol-related disorders" [MeSH]                                                                                                                                                                                                                                                            | 95491       |
| #2           | Search "alcoholism"[MeSH]                                                                                                                                                                                                                                                                            | 65900       |
| #3           | Search "alcohol drinking"[Mesh]                                                                                                                                                                                                                                                                      | 50301       |
| #4           | Search "alcohol depend*"                                                                                                                                                                                                                                                                             | 9200        |
| #5           | Search "alcohol misuse"                                                                                                                                                                                                                                                                              | 1524        |
| #6           | Search "alcohol addiction*"                                                                                                                                                                                                                                                                          | 863         |
| #7           | Search "alcohol abuse"                                                                                                                                                                                                                                                                               | 13410       |
| #8           | Search "problem drink*"                                                                                                                                                                                                                                                                              | 2379        |
| #9           | Search "alcohol consumption"                                                                                                                                                                                                                                                                         | 28120       |
| #10          | Search "harmful alcohol*"                                                                                                                                                                                                                                                                            | 291         |
| #11          | Search "hazardous alcohol*"                                                                                                                                                                                                                                                                          | 342         |
| #12          | Search "risky alcohol*"                                                                                                                                                                                                                                                                              | 219         |
| #13          | Search "harmful drink*"                                                                                                                                                                                                                                                                              | 312         |
| #14          | Search "hazardous drink*"                                                                                                                                                                                                                                                                            | 680         |
| #15          | Search "risky drink*"                                                                                                                                                                                                                                                                                | 384         |
| #16          | Search "((drinking[tiab] OR drinker[tiab] OR drinkers[tiab] AND alcohol[tiab]))"                                                                                                                                                                                                                     | 27661       |
| #17          | Search (#1 or #2 or #3 or #4 or #5 or #6 or #7 or #8 or #9 or #10 or #11 or #12 or #13 or #14 or #15 or #16)                                                                                                                                                                                         | 155363      |
| #18          | Search (((patient[tiab] OR client[tiab] OR user[tiab]) AND (centred[tiab] OR centred[tiab] OR focus*[tiab] OR perspective[tiab] OR empower*[tiab] OR orient*[tiab] OR control*[tiab] OR decision[tiab] OR participation[tiab] OR tailor*[tiab] OR control*[tiab] OR adapt*[tiab] OR prefer*[tiab]))) | 372447      |
| #19          | Search "shared-decision making"                                                                                                                                                                                                                                                                      | 2478        |
| #20          | Search ((motivational AND (intervention OR interviewing)))                                                                                                                                                                                                                                           | 3334        |
| #21          | Search "brief intervention"                                                                                                                                                                                                                                                                          | 1551        |
| #22          | Search ("as needed" OR "as-needed")                                                                                                                                                                                                                                                                  | 5302        |
| #23          | Search "treatment options"[tiab]                                                                                                                                                                                                                                                                     | 36818       |
| #24          | Search (#18 or #19 or #20 or #21 or #22 or #23)                                                                                                                                                                                                                                                      | 414623      |
| #25          | Search ((#17 AND #24))                                                                                                                                                                                                                                                                               | 3841        |
| #26          | Search (#17 AND #24) Filters: Clinical trials; Humans; Adults; English                                                                                                                                                                                                                               | 632         |

# Scopus Search

Scopus Search, run on June 30<sup>th</sup>, 2014

| Search Query |                                                                                                                                                                                                          | Items found |
|--------------|----------------------------------------------------------------------------------------------------------------------------------------------------------------------------------------------------------|-------------|
| #1           | TITLE-ABS-KEY (alcohol-related-disorders)                                                                                                                                                                | 5579        |
| #2           | TITLE-ABS-KEY (alcoholism)                                                                                                                                                                               | 109243      |
| #3           | TITLE-ABS-KEY (alcohol drinking)                                                                                                                                                                         | 70343       |
| #4           | TITLE-ABS-KEY (alcohol depend*)                                                                                                                                                                          | 81403       |
| #5           | TITLE-ABS-KEY (alcohol misuse)                                                                                                                                                                           | 4420        |
| #6           | TITLE-ABS-KEY (alcohol addict*)                                                                                                                                                                          | 22394       |
| #7           | TITLE-ABS-KEY (alcohol abuse*)                                                                                                                                                                           | 54401       |
| #8           | TITLE-ABS-KEY (problem drinking)                                                                                                                                                                         | 19837       |
| #9           | TITLE-ABS-KEY ((hazardous OR harmful OR risky) AND drink*)                                                                                                                                               | 6177        |
| #10          | TITLE-ABS-KEY (drinking OR drinker OR drinkers ) AND (alcohol))                                                                                                                                          | 72405       |
| #11          | #1 or #2 or #3 or #4 or #5 or #6 or #7 or #8 or #9 or #10                                                                                                                                                | 246903      |
| #12          | TITLE-ABS-KEY ((patient OR client OR user) AND ( centred OR centred OR focus* OR perspective OR empower* OR orient* OR 2ontrol* OR decision OR participation OR tailor* OR invol* OR adapt* OR prefer*)) | 2755491     |
| #13          | TITLE-ABS-KEY (shared decision-making)                                                                                                                                                                   | 8314        |
| #14          | TITLE-ABS-KEY (motivational AND (intervention OR interviewing))                                                                                                                                          | 5398        |
| #15          | TITLE-ABS-KEY (brief intervention)                                                                                                                                                                       | 15369       |
| #16          | TITLE-ABS-KEY ((as needed) OR (as-needed))                                                                                                                                                               | 761674      |
| #17          | TITLE-ABS-KEY (treatment options)                                                                                                                                                                        | 158754      |
| #18          | #12 OR #13 OR #14 OR #15 OR #16 OR #17                                                                                                                                                                   | 3517333     |
| #19          | #11 AND #18                                                                                                                                                                                              | 36595       |
| #20          | #19 AND (LIMIT-TO (DOCTYPE "ar"))                                                                                                                                                                        | 28977       |
| #21          | #20 AND (LIMIT-TO(LANGUAGE "English"))                                                                                                                                                                   | 26412       |
| #22          | #21 AND (LIMIT-TO(SUBJAREA,"MEDI) OR LIMIT-TO(SUBJAREA, "PSYCH"))                                                                                                                                        | 23491       |
| #23          | TITLE-ABS-KEY (random OR rct OR trial OR randomised controlled trial OR randomized controlled trial)                                                                                                     | 776353      |
| #24          | #22 and #23                                                                                                                                                                                              | 3312        |

Search on Cochrane Library  
Search run on August 6<sup>th</sup>, 2014

| Search Query |                                                                                                                                                                                            | Items found |
|--------------|--------------------------------------------------------------------------------------------------------------------------------------------------------------------------------------------|-------------|
| #1           | [mh "Alcohol-Related Disorders"]                                                                                                                                                           | 3527        |
| #2           | [mh Alcoholism]                                                                                                                                                                            | 2403        |
| #3           | [mh "alcohol drinking"]                                                                                                                                                                    | 2437        |
| #4           | alcohol depend*                                                                                                                                                                            | 4704        |
| #5           | "alcohol misuse"                                                                                                                                                                           | 225         |
| #6           | alcohol addiction*                                                                                                                                                                         | 1473        |
| #7           | "alcohol abuse"                                                                                                                                                                            | 1180        |
| #8           | problem drink*                                                                                                                                                                             | 1400        |
| #9           | alcohol problem*                                                                                                                                                                           | 2788        |
| #10          | "alcohol consumption"                                                                                                                                                                      | 2240        |
| #11          | harmful alcohol*                                                                                                                                                                           | 577         |
| #12          | harmful drink*                                                                                                                                                                             | 255         |
| #13          | (drinking:ti or drinking:ab or drinker:ti or drinker:ab or drinkers:ti or drinkers:ab) and (alcohol:ti or alcohol:ab) risky drink*                                                         | 2920        |
| #14          | risky drink*                                                                                                                                                                               | 202         |
| #15          | hazardous drink*                                                                                                                                                                           | 218         |
| #16          | #1 or #2 or #3 or #4 or #5 or #6 or #7 or #8 or #9 or #10 or #11 or #12 or #13 or #14 or #15                                                                                               | 11105       |
| #17          | ((patient or client or user) and (centered or centred or focus* or perspective or empower* or orient* or 3ontrol* or decision or participation or tailor* or invol* or adapt* or prefer*)) | 450830      |
| #18          | shared decision-making                                                                                                                                                                     | 685         |
| #19          | (motivational and (intervention or interviewing))                                                                                                                                          | 2026        |
| #20          | brief intervention                                                                                                                                                                         | 18815       |
| #21          | (as needed) or (as-needed)                                                                                                                                                                 | 44723       |
| #22          | treatment options                                                                                                                                                                          | 12267       |
| #23          | #17 or #18 or #19 or #20 or #21 or #22                                                                                                                                                     | 463827      |
| #24          | #16 and #23                                                                                                                                                                                | 6532        |
| #25          | adult or adults or [mh adult]                                                                                                                                                              | 341670      |
| #26          | #24 and #25                                                                                                                                                                                | 4542        |
| #27          | Restrict to Trials                                                                                                                                                                         | 3104        |

## Appendix B

### Excluded Studies

| Author and year           | Reason                                                                                                                                                       |
|---------------------------|--------------------------------------------------------------------------------------------------------------------------------------------------------------|
| Adamson 2005(1)           | Other drugs, psychiatric diagnoses present                                                                                                                   |
| Anderson 2002 (2)         | Sample selection                                                                                                                                             |
| Andreasson 2002 (3)       | Elements of CBT in the intervention                                                                                                                          |
| Baer 2001 (4)             | Not clearly adult population                                                                                                                                 |
| Ball 2007 (5)             | Other substances involved besides alcohol                                                                                                                    |
| Ball 2007(5)              | Alcohol dependent excluded, daily computerized monitoring system used (might have confounded the true PCC effect)                                            |
| Beckham 2007(6)           | Patients with psychiatric comorbidities included                                                                                                             |
| Bewick 2008(7)            | Intervention not clearly PCC                                                                                                                                 |
| Bewick 2013(8)            | Intervention not clearly PCC                                                                                                                                 |
| Blondell 2011(9)          | Exclusively inpatients                                                                                                                                       |
| Blow 2010(10)             | Effectiveness analysis ongoing                                                                                                                               |
| Boon 2011(11)             | Although the online intervention had elements of PCC, patients were told a cover story to reduce the risk of response bias stemming from social desirability |
| Borsari 2000(12)          | Not valid outcomes reported                                                                                                                                  |
| Carroll 2006(13)          | Group therapy, groups not homogeneous in the treatments they receive                                                                                         |
| Carroll 2009(14)          | Multiple substances involved                                                                                                                                 |
| Collins 2005(15)          | Outcomes and Intervention not clearly PCC                                                                                                                    |
| Córdoba 1998(16)          | Intervention not clearly PCC                                                                                                                                 |
| Cunningham 2012(17)       | Elements not PCC in the intervention                                                                                                                         |
| Cunningham 2012(18)       | Intervention not clearly PCC                                                                                                                                 |
| Davidson 2004(19)         | Intervention not PCC                                                                                                                                         |
| Delrahim-Howlett 2011(20) | Intervention not clearly PCC                                                                                                                                 |
| Dent 2008(21)             | Intervention not clearly PCC                                                                                                                                 |
| Ekman 2011(22)            | Intervention not clearly PCC                                                                                                                                 |
| Feldstein 2009(23)        | Follow up time                                                                                                                                               |
| Field 2010a(24)           | Results separated per ethnicity                                                                                                                              |
| Field 2010b(25)           | Results separated per alcohol dependence present or not (no direct comparison between TAU+ and BMI).                                                         |
| Fingfeld-Connet 2009(26)  | Intervention not exclusively PCC                                                                                                                             |
| Fingfeld-Connet 2008(27)  | Intervention not exclusively PCC                                                                                                                             |
| Fleming 2010(28)          | Intervention not clearly PCC                                                                                                                                 |
| Fleming 2004(29)          | Intervention not clearly PCC                                                                                                                                 |
| Forsberg 2000(30)         | Intervention not clearly PCC                                                                                                                                 |
| Gentilello 1999(31)       | Patients not aware of the true study aim                                                                                                                     |
| Goodall 2008(32)          | Results not reported (only significance)                                                                                                                     |
| Grønbaek 2007(33)         | Intervention not PCC                                                                                                                                         |
| Gordon 2003(34)           | Study design                                                                                                                                                 |
| Hansen 2012(35)           | Intervention not clearly PCC (only personalized normative feedback)                                                                                          |
| Hendershot 2010(18)       | Follow up time 1 month                                                                                                                                       |

|                                             |                                                                                                                                |
|---------------------------------------------|--------------------------------------------------------------------------------------------------------------------------------|
| Hermansson 2010(36)                         | Intervention not clearly PCC                                                                                                   |
| Hester 2005(37)                             | Study design                                                                                                                   |
| Kulesza 2013(38)                            | Follow up time 4 weeks                                                                                                         |
| Kypri 2009(39)                              | Patients blind to the true nature of the study                                                                                 |
| Kypri 2008(40)                              | Intervention not clearly PCC                                                                                                   |
| Larimer 2007(41)                            | Feedback automatically prepared by a computer                                                                                  |
| Longabaugh 2008(42)                         | Study design                                                                                                                   |
| Manwell 2000(43)                            | Intervention not clearly PCC                                                                                                   |
| Marlatt 1998(44)                            | Outcomes reported                                                                                                              |
| Martens 2010 (45)                           | Intervention not clearly PCC                                                                                                   |
| McCrary 2011(46)                            | Outcomes reported                                                                                                              |
| Michaud 2013(47)                            | Patients were recruited during a mandatory occupational medicine visit                                                         |
| Miller 1993(48)                             | Inclusion criteria not reported. Small sample size                                                                             |
| Moore 2010(49)                              | Intervention not clearly PCC ( although it states the use of MI techniques, the description is not clearly consistent with MI) |
| Murphy 2010(50)                             | Follow up time 1 month                                                                                                         |
| Neto 2008(51)                               | Intervention not PCC                                                                                                           |
| Neumann 2006(52)                            | Cover information used                                                                                                         |
| Ockene 1999(53)                             | Cluster randomized                                                                                                             |
| Pal 2007(54)                                | Sociocultural context                                                                                                          |
| Pengpid 2013(55)                            | Intervention not only PCC                                                                                                      |
| Postel 2010(56)                             | Intervention based also on CBT                                                                                                 |
| Reiff-Hekkin 2010(57)                       | Cluster-randomized                                                                                                             |
| Rodríguez-Martos 2005(58)                   | Language restriction. Motivational intervention not described                                                                  |
| Romo 2009(59)                               | Inpatients                                                                                                                     |
| Roudsari 2009(60)                           | Outcomes reported                                                                                                              |
| Rubio 2010(61)                              | Intervention not clearly PCC                                                                                                   |
| Rubio 2002(62)                              | No placebo matching, not clearly PCC                                                                                           |
| Saitz 2013(63)                              | Alcohol plus other drugs                                                                                                       |
| Schaus 2009 (64)                            | Elements of CBT in the intervention                                                                                            |
| Suffoletto 2012(65)                         | Intervention not clearly PCC                                                                                                   |
| Tomson 1998(66)                             | Intervention not clearly PCC                                                                                                   |
| Trinks 2010(67)                             | Intervention not clearly PCC                                                                                                   |
| Turrisi 2009 (68)                           | Study design                                                                                                                   |
| Van den Brink 2014 (69)                     | Psychiatric diagnoses present                                                                                                  |
| Wallace 2011(70)                            | Intervention not exclusively PCC                                                                                               |
| York 2012(71)                               | Cover story, study design, follow up times, type of intervention                                                               |
| WHO Brief Intervention Study Group 1996(72) | Intervention not clearly PCC                                                                                                   |
| Wood 2007(73)                               | Outcomes reported                                                                                                              |
| Wild 2007(74)                               | Intervention not clearly PCC                                                                                                   |

1. Adamson SJ, Sellman DJ, Dore GM. Therapy preference and treatment outcome in clients with mild to moderate alcohol dependence. *Drug Alcohol Rev* [Internet]. 2005 May [cited 2014 Jun 16];24(3):209–16. Available from: <http://www.scopus.com/inward/record.url?eid=2-s2.0-26844510902&partnerID=tZOtx3y1>
2. Anderson BK, Larimer ME. Problem drinking and the workplace: An individualized approach to prevention. *Psychol Addict Behav* [Internet]. 2002 [cited 2014 Jun 23];16(3):243–51. Available from: <http://www.scopus.com/inward/record.url?eid=2-s2.0-0036714245&partnerID=tZOtx3y1>
3. Andreasson S, Hansagi H, Osterlund B. Short-term treatment for alcohol-related problems: four-session guided self-change versus one session of advice--a randomized, controlled trial. *Alcohol*. 2002/10/16 ed. 2002;28(1):57–62.
4. Baer JS, Kivlahan DR, Blume AW, McKnight P, Marlatt GA. Brief intervention for heavy-drinking college students: 4-year follow-up and natural history. *Am J Public Heal*. 2001/08/14 ed. 2001;91(8):1310–6.
5. Ball SA, Martino S, Nich C, Frankforter TL, Van Horn D, Crits-Christoph P, et al. Site matters: multisite randomized trial of motivational enhancement therapy in community drug abuse clinics. *J Consult Clin Psychol*. 2007/08/01 ed. 2007;75(4):556–67.
6. Beckham N. Motivational interviewing with hazardous drinkers. *J Am Acad Nurse Pr*. 2007/02/16 ed. 2007;19(2):103–10.
7. Bewick BM, Trusler K, Mulhern B, Barkham M, Hill AJ. The feasibility and effectiveness of a web-based personalised feedback and social norms alcohol intervention in UK university students: a randomised control trial. *Addict Behav*. 2008/06/17 ed. 2008;33(9):1192–8.
8. Bewick BM, West RM, Barkham M, Mulhern B, Marlow R, Traviss G, et al. The effectiveness of a Web-based personalized feedback and social norms alcohol intervention on United Kingdom university students: randomized controlled trial. *J Med Internet Res*. 2013/07/26 ed. 2013;15(7):e137.
9. Blondell RD, Frydrych LM, Jaanimagi U, Ashrafioun L, Homish GG, Foschio EM, et al. A randomized trial of two behavioral interventions to improve outcomes following inpatient detoxification for alcohol dependence. *J Addict Dis*. 2011/04/15 ed. 2011;30(2):136–48.
10. Blow FC, Walton MA, Murray R, Cunningham RM, Chermack ST, Barry KL, et al. Intervention attendance among emergency department patients with alcohol- and drug-use disorders. *J Stud Alcohol Drugs*. 2010/08/25 ed. 2010;71(5):713–9.
11. Boon B, Risselada A, Huiberts A, Riper H, Smit F. Curbing alcohol use in male adults through computer generated personalized advice: randomized controlled trial. *J Med Internet Res* [Internet]. 2011 Jan [cited 2014 Jun 27];13(2):e43. Available from: <http://www.scopus.com/inward/record.url?eid=2-s2.0-79959945485&partnerID=tZOtx3y1>
12. Borsari B, Carey KB. Effects of a brief motivational intervention with college student drinkers. *J Consult Clin Psychol*. 2000/08/31 ed. 2000;68(4):728–33.
13. Carroll KM, Ball SA, Nich C, Martino S, Frankforter TL, Farentinos C, et al. Motivational interviewing to improve treatment engagement and outcome in individuals seeking treatment for substance abuse: a multisite effectiveness study. *Drug Alcohol Depend* [Internet]. 2006 Mar 28 [cited 2014 May 30];81(3):301–12. Available from: <http://www.scopus.com/inward/record.url?eid=2-s2.0-31444439991&partnerID=tZOtx3y1>
14. Carroll KM, Martino S, Ball SA, Nich C, Frankforter T, Anez LM, et al. A multisite randomized effectiveness trial of motivational enhancement therapy for Spanish-speaking substance users. *J Consult Clin Psychol*. 2009/10/07 ed. 2009;77(5):993–9.
15. Collins SE, Carey KB. Lack of effect for decisional balance as a brief motivational intervention for at-risk college drinkers. *Addict Behav*. 2005/07/19 ed. 2005;30(7):1425–30.

16. Cordoba R, Delgado MT, Pico V, Altisent R, Fores D, Monreal A, et al. Effectiveness of brief intervention on non-dependent alcohol drinkers (EBIAL): a Spanish multi-centre study. *Fam Pr*. 1999/03/17 ed. 1998;15(6):562–8.
17. Cunningham JA, Neighbors C, Wild C, Humphreys K. Ultra-brief intervention for problem drinkers: results from a randomized controlled trial. *PLoS One* [Internet]. 2012 Jan [cited 2014 Jun 25];7(10):e48003. Available from: <http://www.scopus.com/inward/record.url?eid=2-s2.0-84868102612&partnerID=tZOtx3y1>
18. Cunningham JA, Hendershot CS, Murphy M, Neighbors C. Pragmatic randomized controlled trial of providing access to a brief personalized alcohol feedback intervention in university students. *Addict Sci Clin Pr*. 2012/11/29 ed. 2012;7(1):21.
19. Davidson D, Saha C, Scifres S, Fyffe J, O'Connor S, Selzer C. Naltrexone and brief counseling to reduce heavy drinking in hazardous drinkers. *Addict Behav*. 2004/07/09 ed. 2004;29(6):1253–8.
20. Delrahim-Howlett K, Chambers CD, Clapp JD, Xu R, Duke K, Moyer 3rd RJ, et al. Web-based assessment and brief intervention for alcohol use in women of childbearing potential: a report of the primary findings. *Alcohol Clin Exp Res*. 2011/03/18 ed. 2011;35(7):1331–8.
21. Dent AW, Weiland TJ, Phillips GA, Lee NK. Opportunistic screening and clinician-delivered brief intervention for high-risk alcohol use among emergency department attendees: a randomized controlled trial. *Emerg Med Australas*. 2008/04/02 ed. 2008;20(2):121–8.
22. Ekman DS, Andersson A, Nilsen P, Stahlbrandt H, Johansson AL, Bendtsen P. Electronic screening and brief intervention for risky drinking in Swedish university students--a randomized controlled trial. *Addict Behav*. 2011/02/15 ed. 2011;36(6):654–9.
23. Feldstein Ewing SW, LaChance HA, Bryan A, Hutchison KE. Do genetic and individual risk factors moderate the efficacy of motivational enhancement therapy? Drinking outcomes with an emerging adult sample. *Addict Biol*. 2009/03/21 ed. 2009;14(3):356–65.
24. Field CA, Caetano R, Harris TR, Frankowski R, Roudsari B. Ethnic differences in drinking outcomes following a brief alcohol intervention in the trauma care setting. *Addiction*. 2009/11/19 ed. 2010;105(1):62–73.
25. Field CA, Caetano R. The effectiveness of brief intervention among injured patients with alcohol dependence: who benefits from brief interventions? *Drug Alcohol Depend* [Internet]. 2010 Sep 1 [cited 2014 Jun 27];111(1-2):13–20. Available from: <http://www.scopus.com/inward/record.url?eid=2-s2.0-77956187304&partnerID=tZOtx3y1>
26. Finfgeld-Connett D, Madsen R. Web-based treatment of alcohol problems among rural women. *J Psychosoc Nurs Ment Heal Serv*. 2008/10/01 ed. 2008;46(9):46–53.
27. Finfgeld-Connett D. Web-based treatment for rural women with alcohol problems: preliminary findings. *Comput Inform Nurs* [Internet]. 2009 Jan [cited 2014 Jun 30];27(6):345–53. Available from: <http://www.scopus.com/inward/record.url?eid=2-s2.0-70449570894&partnerID=tZOtx3y1>
28. Fleming MF, Balousek SL, Grossberg PM, Mundt MP, Brown D, Wiegel JR, et al. Brief physician advice for heavy drinking college students: a randomized controlled trial in college health clinics. *J Stud Alcohol Drugs*. 2010/01/29 ed. 2010;71(1):23–31.
29. Fleming M, Brown R, Brown D. The efficacy of a brief alcohol intervention combined with %CDT feedback in patients being treated for type 2 diabetes and/or hypertension. *J Stud Alcohol*. 2004/11/13 ed. 2004;65(5):631–7.
30. Forsberg L, Ekman S, Halldin J, Ronnberg S. Brief interventions for risk consumption of alcohol at an emergency surgical ward. *Addict Behav*. 2000/07/13 ed. 2000;25(3):471–5.
31. Gentilello LM, Rivara FP, Donovan DM, Jurkovich GJ, Daranciang E, Dunn CW, et al. Alcohol interventions in a trauma center as a means of reducing the risk of injury recurrence. *Ann Surg*. 1999/10/16 ed. 1999;230(4):473.

32. Goodall CA, Ayoub AF, Crawford A, Smith I, Bowman A, Koppel D, et al. Nurse-delivered brief interventions for hazardous drinkers with alcohol-related facial trauma: a prospective randomised controlled trial. *Br J Oral Maxillofac Surg*. 2007/12/28 ed. 2008;46(2):96–101.
33. Gronbaek M, Nielsen B. A randomized controlled trial of Minnesota day clinic treatment of alcoholics. *Addiction*. 2007/02/15 ed. 2007;102(3):381–8.
34. Gordon AJ, Conigliaro J, Maisto SA, McNeil M, Kraemer KL, Kelley ME. Comparison of consumption effects of brief interventions for hazardous drinking elderly. *Subst Use Misuse*. 2003/08/07 ed. 2003;38(8):1017–35.
35. Hansen AB, Becker U, Nielsen AS, Gronbaek M, Tolstrup JS. Brief alcohol intervention by newly trained workers versus leaflets: comparison of effect in older heavy drinkers identified in a population health examination survey: a randomized controlled trial. *Alcohol Alcohol*. 2011/09/29 ed. 2012;47(1):25–32.
36. Hermansson U, Helander A, Brandt L, Huss A, Ronnberg S. Screening and brief intervention for risky alcohol consumption in the workplace: results of a 1-year randomized controlled study. *Alcohol Alcohol*. 2010/04/22 ed. 2010;45(3):252–7.
37. Hester RK, Squires DD, Delaney HD. The Drinker's Check-up: 12-month outcomes of a controlled clinical trial of a stand-alone software program for problem drinkers. *J Subst Abuse Treat* [Internet]. 2005 Mar [cited 2014 Jun 12];28(2):159–69. Available from: <http://www.scopus.com/inward/record.url?eid=2-s2.0-15044349582&partnerID=tZOtx3y1>
38. Kulesza M, McVay MA, Larimer ME, Copeland AL. A randomized clinical trial comparing the efficacy of two active conditions of a brief intervention for heavy college drinkers. *Addict Behav*. 2013/02/16 ed. 2013;38(4):2094–101.
39. Kypri K, Hallett J, Howat P, McManus A, Maycock B, Bowe S, et al. Randomized controlled trial of proactive web-based alcohol screening and brief intervention for university students. *Arch Intern Med* [Internet]. 2009 Sep 14 [cited 2014 Jun 30];169(16):1508–14. Available from: <http://www.scopus.com/inward/record.url?eid=2-s2.0-70349261197&partnerID=tZOtx3y1>
40. Kypri K, Langley JD, Saunders JB, Cashell-Smith ML, Herbison P. Randomized controlled trial of web-based alcohol screening and brief intervention in primary care. *Arch Intern Med*. 2008/03/12 ed. 2008;168(5):530–6.
41. Larimer ME, Lee CM, Kilmer JR, Fabiano PM, Stark CB, Geisner IM, et al. Personalized mailed feedback for college drinking prevention: a randomized clinical trial. *J Consult Clin Psychol* [Internet]. 2007 Apr [cited 2014 Jun 30];75(2):285–93. Available from: <http://www.scopus.com/inward/record.url?eid=2-s2.0-34249695999&partnerID=tZOtx3y1>
42. Mello MJ, Longabaugh R, Baird J, Nirenberg T, Woolard R. DIAL: a telephone brief intervention for high-risk alcohol use with injured emergency department patients. *Ann Emerg Med*. 2008/04/26 ed. 2008;51(6):755–64.
43. Manwell LB, Fleming MF, Mundt MP, Stauffacher EA, Barry KL. Treatment of problem alcohol use in women of childbearing age: results of a brief intervention trial. *Alcohol Clin Exp Res*. 2000/10/25 ed. 2000;24(10):1517–24.
44. Marlatt GA, Baer JS, Kivlahan DR, Dimeff LA, Larimer ME, Quigley LA, et al. Screening and brief intervention for high-risk college student drinkers: Results from a 2-year follow-up assessment. *J Consult Clin Psychol* [Internet]. 1998 [cited 2014 Jun 30];66(4):604–15. Available from: <http://www.scopus.com/inward/record.url?eid=2-s2.0-0031838187&partnerID=tZOtx3y1>
45. Martens MP, Kilmer JR, Beck NC, Zamboanga BL. The efficacy of a targeted personalized drinking feedback intervention among intercollegiate athletes: a randomized controlled trial. *Psychol Addict Behav*. 2010/09/09 ed. 2010;24(4):660–9.
46. McCrady BS, Epstein EE, Cook S, Jensen NK, Ladd BO. What do women want? Alcohol treatment choices, treatment entry and retention. *Psychol Addict Behav*. 2011/06/08 ed. 2011;25(3):521–9.



47. Michaud P, Kunz V, Demortiere G, Lancrenon S, Carre A, Menard C, et al. Efficiency of brief interventions on alcohol-related risks in occupational medicine. *Glob Heal Promot*. 2013/05/25 ed. 2013;20(2 Suppl):99–105.
48. Miller WR, Benefield RG, Tonigan JS. Enhancing motivation for change in problem drinking: a controlled comparison of two therapist styles. *J Consult Clin Psychol*. 1993/06/01 ed. 1993;61(3):455–61.
49. Moore AA, Blow FC, Hoffing M, Welgreen S, Davis JW, Lin JC, et al. Primary care-based intervention to reduce at-risk drinking in older adults: a randomized controlled trial. *Addiction*. 2010/12/15 ed. 2011;106(1):111–20.
50. Murphy JG, Dennhardt AA, Skidmore JR, Martens MP, McDevitt-Murphy ME. Computerized versus motivational interviewing alcohol interventions: impact on discrepancy, motivation, and drinking. *Psychol Addict Behav* [Internet]. 2010 Dec [cited 2014 Jun 27];24(4):628–39. Available from: <http://www.scopus.com/inward/record.url?eid=2-s2.0-78651376336&partnerID=tZOtx3y1>
51. Neto D, Lambaz R, Aguiar P, Chick J. Effectiveness of sequential combined treatment in comparison with treatment as usual in preventing relapse in alcohol dependence. *Alcohol Alcohol*. 2008/10/15 ed. 2008;43(6):661–8.
52. Neumann T, Neuner B, Weiss-Gerlach E, Tønnesen H, Gentilello LM, Wernecke K-D, et al. The effect of computerized tailored brief advice on at-risk drinking in subcritically injured trauma patients. *J Trauma* [Internet]. 2006 Oct [cited 2014 Jun 16];61(4):805–14. Available from: <http://www.scopus.com/inward/record.url?eid=2-s2.0-33749985000&partnerID=tZOtx3y1>
53. Ockene JK, Adams A, Hurley TG, Wheeler E V, Hebert JR. Brief physician- and nurse practitioner-delivered counseling for high-risk drinkers: does it work? *Arch Intern Med*. 1999/10/20 ed. 1999;159(18):2198–205.
54. Pal HR, Yadav D, Mehta S, Mohan I. A comparison of brief intervention versus simple advice for alcohol use disorders in a North India community-based sample followed for 3 months. *Alcohol Alcohol*. 2007/03/16 ed. 2007;42(4):328–32.
55. Pengpid S, Peltzer K, van der Heever H, Skaal L. Screening and brief interventions for hazardous and harmful alcohol use among university students in South Africa: results from a randomized controlled trial. *Int J Env Res Public Heal*. 2013/05/24 ed. 2013;10(5):2043–57.
56. Postel MG, de Haan HA, ter Huurne ED, Becker ES, de Jong CAJ. Effectiveness of a web-based intervention for problem drinkers and reasons for dropout: randomized controlled trial. *J Med Internet Res* [Internet]. 2010 Jan [cited 2014 Jun 27];12(4):e68. Available from: <http://www.scopus.com/inward/record.url?eid=2-s2.0-78651339521&partnerID=tZOtx3y1>
57. Ockene JK, Reed GW, Reiff-Hekking S. Brief patient-centered clinician-delivered counseling for high-risk drinking: 4-year results. *Ann Behav Med*. 2009/08/27 ed. 2009;37(3):335–42.
58. Dauer AR-M, Rubio ES, Coris ME, Valls JM. Brief intervention in alcohol-positive traffic casualties: is it worth the effort? *Alcohol Alcohol* [Internet]. Jan [cited 2014 Apr 21];41(1):76–83. Available from: <http://www.ncbi.nlm.nih.gov/pubmed/16303790>
59. Romo L, Le Strat Y, Aubry C, Marquez S, Houdeyer K, Batel P, et al. The role of brief motivational intervention on self-efficacy and abstinence in a cohort of patients with alcohol dependence. *Int J Psychiatry Med*. 2009/12/09 ed. 2009;39(3):313–23.
60. Roudsari B, Caetano R, Frankowski R, Field C. Do minority or white patients respond to brief alcohol intervention in trauma centers? A randomized trial. *Ann Emerg Med* [Internet]. 2009 Aug [cited 2014 Jun 30];54(2):285–93. Available from: <http://www.scopus.com/inward/record.url?eid=2-s2.0-67650447390&partnerID=tZOtx3y1>
61. Rubio G, Jiménez-Arriero MA, Martínez I, Ponce G, Palomo T. Efficacy of physician-delivered brief counseling intervention for binge drinkers. *Am J Med* [Internet]. 2010 Jan [cited 2014 Jun

- 30];123(1):72–8. Available from: <http://www.scopus.com/inward/record.url?eid=2-s2.0-72649090453&partnerID=tZOtx3y1>
62. Rubio G, Manzanares J, Lopez-Munoz F, Alamo C, Ponce G, Jimenez-Arriero MA, et al. Naltrexone improves outcome of a controlled drinking program. *J Subst Abuse Treat*. 2002/12/24 ed. 2002;23(4):361–6.
  63. Saitz R, Cheng DM, Winter M, Kim TW, Meli SM, Allensworth-Davies D, et al. Chronic care management for dependence on alcohol and other drugs: the AHEAD randomized trial. *Jama*. 2013/09/21 ed. 2013;310(11):1156–67.
  64. Schaus JF, Sole ML, McCoy TP, Mullett N, O'Brien MC. Alcohol screening and brief intervention in a college student health center: a randomized controlled trial. *J Stud Alcohol Drugs Suppl*. 2009/06/30 ed. 2009;(16):131–41.
  65. Suffoletto B, Callaway C, Kristan J, Kraemer K, Clark DB. Text-message-based drinking assessments and brief interventions for young adults discharged from the emergency department. *Alcohol Clin Exp Res [Internet]*. 2012 Mar [cited 2014 Jun 21];36(3):552–60. Available from: <http://www.scopus.com/inward/record.url?eid=2-s2.0-84857502533&partnerID=tZOtx3y1>
  66. Tomson Y, Romelsjö A, Åberg H. Excessive drinking - brief intervention by a primary health care nurse: A randomized controlled trial. *Scand J Prim Health Care [Internet]*. 1998 Jan [cited 2014 Jun 30];16(3):188–93. Available from: <http://www.scopus.com/inward/record.url?eid=2-s2.0-0031681158&partnerID=tZOtx3y1>
  67. Trinks A, Festin K, Bendtsen P, Nilsen P. Reach and effectiveness of a computer-based alcohol intervention in a Swedish emergency room. *Int Emerg Nurs*. 2010/06/15 ed. 2010;18(3):138–46.
  68. Ichiyama MA, Fairlie AM, Wood MD, Turrisi R, Francis DP, Ray AE, et al. A randomized trial of a parent-based intervention on drinking behavior among incoming college freshmen. *J Stud Alcohol Drugs Suppl*. 2009/06/30 ed. 2009;(16):67–76.
  69. Van den Brink W, Aubin H-J, Bladström A, Torup L, Gual A, Mann K. Efficacy of as-needed nalmefene in alcohol-dependent patients with at least a high drinking risk level: results from a subgroup analysis of two randomized controlled 6-month studies. *Alcohol Alcohol [Internet]*. 2013 Jan [cited 2014 Jun 9];48(5):570–8. Available from: <http://www.scopus.com/inward/record.url?eid=2-s2.0-84883015520&partnerID=tZOtx3y1>
  70. Wallace P, Murray E, McCambridge J, Khadjesari Z, White IR, Thompson SG, et al. On-line randomized controlled trial of an internet based psychologically enhanced intervention for people with hazardous alcohol consumption. *PLoS One*. 2011/03/17 ed. 2011;6(3):e14740.
  71. York VK, Brannon LA, Miller MM. Increasing the effectiveness of messages promoting responsible undergraduate drinking: tailoring to personality and matching to context. *Heal Commun*. 2011/09/29 ed. 2012;27(3):302–9.
  72. A cross-national trial of brief interventions with heavy drinkers. WHO Brief Intervention Study Group. *Am J Public Heal*. 1996/07/01 ed. 1996;86(7):948–55.
  73. Wood MD, Capone C, Laforge R, Erickson DJ, Brand NH. Brief motivational intervention and alcohol expectancy challenge with heavy drinking college students: a randomized factorial study. *Addict Behav*. 2007/07/31 ed. 2007;32(11):2509–28.
  74. Wild TC, Cunningham JA, Roberts AB. Controlled study of brief personalized assessment-feedback for drinkers interested in self-help. *Addiction [Internet]*. 2007 Mar [cited 2014 Jun 30];102(2):241–50. Available from: <http://www.scopus.com/inward/record.url?eid=2-s2.0-33846264009&partnerID=tZOtx3y1>

## Appendix C Quality assessment

### Individual Study Quality

| Study                | Power calculation | Randomisation adequate | Allocation concealment adequate | Adjusted for baseline characteristics | Participants blinded | Outcome assessors blinded | Drop outs explained | ITT analysis used |
|----------------------|-------------------|------------------------|---------------------------------|---------------------------------------|----------------------|---------------------------|---------------------|-------------------|
| Aalto 2000           | X                 | X                      | X                               | X                                     | N.A.                 | ?                         | √                   | √                 |
| Aalto 2001           | X                 | X                      | X                               | X                                     | N.A.                 | ?                         | √                   | √                 |
| Allen 2011           | √                 | √                      | √                               | √                                     | N.A.                 | ?                         | √                   | √                 |
| Bazargan-Hejazi 2005 | X                 | √                      | X                               | √                                     | N.A.                 | √                         | √                   | ?                 |
| Beich 2007           | √                 | X                      | ?                               | ?                                     | N.A.                 | X                         | √                   | √                 |
| Bischof 2008         | √                 | √                      | √                               | X                                     | N.A.                 | √                         | √                   | √                 |
| Brown 2007           | √                 | √                      | ?                               | √                                     | N.A.                 | √                         | √                   | √                 |
| Brown 2010           | √                 | √                      | √                               | X                                     | N.A.                 | √                         | √                   | √                 |
| Carey 2006           | X                 | ?                      | ?                               | √                                     | N.A.                 | ?                         | √                   | ?                 |
| Chang 2011           | X                 | √                      | ?                               | √                                     | N.A.                 | ?                         | √                   | √                 |
| Cherpitel 2010       | X                 | ?                      | ?                               | √                                     | N.A.                 | √                         | √                   | ?                 |
| Curry 2003           | ?                 | ?                      | ?                               | √                                     | N.A.                 | √                         | √                   | √                 |
| D'Onofrio 2008       | √                 | √                      | √                               | √                                     | N.A.                 | √                         | √                   | √                 |
| D'Onofrio 2012       | √                 | X                      | √                               | √                                     | N.A.                 | √                         | √                   | √                 |
| Daeppen 2007         | √                 | √                      | √                               | √                                     | N.A.                 | √                         | √                   | √                 |
| Daeppen 2011         | X                 | √                      | √                               | √                                     | N.A.                 | ?                         | √                   | ?                 |
| Emmen 2005           | X                 | √                      | √                               | √                                     | N.A.                 | X                         | √                   | √                 |
| Gaume 2011           | X                 | √                      | X                               | √                                     | N.A.                 | √                         | √                   | ?                 |
| Gual 2013            | √                 | √                      | √                               | √                                     | √                    | √                         | √                   | √                 |
| Hansen 2011          | √                 | √                      | √                               | √                                     | N.A.                 | √                         | √                   | √                 |
| Heinala 2001         | X                 | ?                      | ?                               | X                                     | √                    | ?                         | X                   | ?                 |
| Hermansson 2010      | X                 | √                      | X                               | √                                     | N.A.                 | ?                         | √                   | √                 |
| Karhuvaara 2007      | √                 | ?                      | √                               | √                                     | √                    | √                         | √                   | √                 |
| Kranzler 2009        | X                 | ?                      | ?                               | √                                     | √                    | √                         | √                   | ?                 |

|                    |   |   |   |   |      |   |   |   |
|--------------------|---|---|---|---|------|---|---|---|
| Lee 2011           | X | ? | ? | X | N.A. | √ | √ | ? |
| Longabaugh 2001    | X | ? | √ | ? | N.A. | √ | √ | ? |
| Maisto 2001        | X | √ | √ | √ | N.A. | ? | √ | √ |
| Mann 2013          | √ | √ | √ | √ | √    | √ | √ | √ |
| Mello 2013         | X | ? | ? | √ | N.A. | √ | √ | √ |
| Monti 2007         | X | √ | X | √ | N.A. | √ | √ | √ |
| Murphy 2004        | X | ? | ? | X | N.A. | ? | √ | ? |
| Murphy 2001        | X | ? | ? | √ | N.A. | ? | √ | ? |
| Noknoy 2010        | √ | √ | √ | √ | N.A. | √ | √ | ? |
| Project MATCH 1997 | √ | √ | ? | √ | N.A. | ? | √ | √ |
| Sellman 2001       | X | ? | ? | X | N.A. | √ | √ | ? |
| Senft 1997         | √ | ? | ? | X | N.A. | √ | √ | √ |
| Shakeshaft 2002    | X | √ | ? | X | N.A. | ? | √ | X |
| Soderstrom 2007    | X | ? | ? | X | N.A. | √ | √ | √ |
| Sommers 2013       | √ | √ | √ | √ | N.A. | √ | √ | √ |
| UKATT 2005         | √ | √ | √ | √ | N.A. | √ | √ | √ |

\*Key: √ = Judged as adequate; X = Judged as inadequate; ? = Unclear; N.A. = not assessed.

\*Power calculation judged adequate if sample size calculation is done before recruitment. Randomisation judged adequate if a truly random component used in the process (e.g., random numbers table, coin tossing, shuffling envelopes). Allocation concealment judged adequate if participants and investigators enrolling patients not able to foresee assignment thanks to a concealment method (e.g., central allocation with phone or web service, sequentially numbered drug containers of identical appearance, sequentially numbered, opaque, sealed envelopes). Adjustment for baseline characteristics considered adequate if regression models used to take into account baseline data. Participants blinded judged adequate if blinding of participants is reported. Outcome assessors blinded judged adequate if blinding of key study personnel, especially those assessing outcome, is reported. Drop outs explained judged adequate if corresponding numbers are reported. ITT analysis judged adequate if statistical results are obtained using an intention to treat approach.

### Study quality characteristics of all included studies

|                 | Power calculation | Randomization | Allocation concealment | Adjusted analysis | Outcome assessors blinded | Drop outs explained | ITT analysis |
|-----------------|-------------------|---------------|------------------------|-------------------|---------------------------|---------------------|--------------|
| Correct; n (%)  | 17 (42.5%)        | 23 (57.5%)    | 18 (45%)               | 26 (65%)          | 27 (67.5%)                | 39 (97.5%)          | 26 (65%)     |
| Incorrect: n(%) | 22 (55%)          | 4 (10%)       | 6 (15%)                | 12 (30%)          | 2 (5%)                    | 1 (2.5%)            | 1 (2.5%)     |
| Unclear: n(%)   | 1 (2.5%)          | 13 (32.5%)    | 16 (40%)               | 2 (5%)            | 11 (27.5%)                | 0                   | 13 (32.5%)   |



| Appendix D                |    |                                                                                                                                                                                                                                                                                                             |                    |
|---------------------------|----|-------------------------------------------------------------------------------------------------------------------------------------------------------------------------------------------------------------------------------------------------------------------------------------------------------------|--------------------|
| Section/topic             | #  | Checklist item                                                                                                                                                                                                                                                                                              | Reported on page # |
| <b>TITLE</b>              |    |                                                                                                                                                                                                                                                                                                             |                    |
| Title                     | 1  | Identify the report as a systematic review, meta-analysis, or both.                                                                                                                                                                                                                                         | 1                  |
| <b>ABSTRACT</b>           |    |                                                                                                                                                                                                                                                                                                             |                    |
| Structured summary        | 2  | Provide a structured summary including, as applicable: background; objectives; data sources; study eligibility criteria, participants, and interventions; study appraisal and synthesis methods; results; limitations; conclusions and implications of key findings; systematic review registration number. | 2                  |
| <b>INTRODUCTION</b>       |    |                                                                                                                                                                                                                                                                                                             |                    |
| Rationale                 | 3  | Describe the rationale for the review in the context of what is already known.                                                                                                                                                                                                                              | 4                  |
| Objectives                | 4  | Provide an explicit statement of questions being addressed with reference to participants, interventions, comparisons, outcomes, and study design (PICOS).                                                                                                                                                  | 5                  |
| <b>METHODS</b>            |    |                                                                                                                                                                                                                                                                                                             |                    |
| Protocol and registration | 5  | Indicate if a review protocol exists, if and where it can be accessed (e.g., Web address), and, if available, provide registration information including registration number.                                                                                                                               |                    |
| Eligibility criteria      | 6  | Specify study characteristics (e.g., PICOS, length of follow-up) and report characteristics (e.g., years considered, language, publication status) used as criteria for eligibility, giving rationale.                                                                                                      | 6                  |
| Information sources       | 7  | Describe all information sources (e.g., databases with dates of coverage, contact with study authors to identify additional studies) in the search and date last searched.                                                                                                                                  | 6                  |
| Search                    | 8  | Present full electronic search strategy for at least one database, including any limits used, such that it could be repeated.                                                                                                                                                                               | Appendix A         |
| Study selection           | 9  | State the process for selecting studies (i.e., screening, eligibility, included in systematic review, and, if applicable, included in the meta-analysis).                                                                                                                                                   | 8                  |
| Data collection process   | 10 | Describe method of data extraction from reports (e.g., piloted forms, independently, in duplicate) and any processes for obtaining and confirming data from investigators.                                                                                                                                  | 7                  |

|                                    |    |                                                                                                                                                                                                                        |                         |
|------------------------------------|----|------------------------------------------------------------------------------------------------------------------------------------------------------------------------------------------------------------------------|-------------------------|
| Data items                         | 11 | List and define all variables for which data were sought (e.g., PICOS, funding sources) and any assumptions and simplifications made.                                                                                  | 7                       |
| Risk of bias in individual studies | 12 | Describe methods used for assessing risk of bias of individual studies (including specification of whether this was done at the study or outcome level), and how this information is to be used in any data synthesis. | 8                       |
| Summary measures                   | 13 | State the principal summary measures (e.g., risk ratio, difference in means).                                                                                                                                          | 8                       |
| Synthesis of results               | 14 | Describe the methods of handling data and combining results of studies, if done, including measures of consistency (e.g., $I^2$ ) for each meta-analysis.                                                              | 8                       |
| Risk of bias across studies        | 15 | Specify any assessment of risk of bias that may affect the cumulative evidence (e.g., publication bias, selective reporting within studies).                                                                           | 8                       |
| Additional analyses                | 16 | Describe methods of additional analyses (e.g., sensitivity or subgroup analyses, meta-regression), if done, indicating which were pre-specified.                                                                       |                         |
| <b>RESULTS</b>                     |    |                                                                                                                                                                                                                        |                         |
| Study selection                    | 17 | Give numbers of studies screened, assessed for eligibility, and included in the review, with reasons for exclusions at each stage, ideally with a flow diagram.                                                        | Fig 1                   |
| Study characteristics              | 18 | For each study, present characteristics for which data were extracted (e.g., study size, PICOS, follow-up period) and provide the citations.                                                                           | Table 1-4, appendix x D |
| Risk of bias within studies        | 19 | Present data on risk of bias of each study and, if available, any outcome level assessment (see item 12).                                                                                                              | Page 10, appendix C     |
| Results of individual studies      | 20 | For all outcomes considered (benefits or harms), present, for each study: (a) simple summary data for each intervention group (b) effect estimates and confidence intervals, ideally with a forest plot.               | Figures                 |
| Synthesis of results               | 21 | Present results of each meta-analysis done, including confidence intervals and measures of consistency.                                                                                                                | 10-11                   |
| Risk of bias across studies        | 22 | Present results of any assessment of risk of bias across studies (see Item 15).                                                                                                                                        | Appendix C              |
| Additional analysis                | 23 | Give results of additional analyses, if done (e.g., sensitivity or subgroup analyses, meta-regression [see Item 16]).                                                                                                  |                         |

| <b>DISCUSSION</b>   |    |                                                                                                                                                                                      |       |
|---------------------|----|--------------------------------------------------------------------------------------------------------------------------------------------------------------------------------------|-------|
| Summary of evidence | 24 | Summarize the main findings including the strength of evidence for each main outcome; consider their relevance to key groups (e.g., healthcare providers, users, and policy makers). | 12-13 |
| Limitations         | 25 | Discuss limitations at study and outcome level (e.g., risk of bias), and at review-level (e.g., incomplete retrieval of identified research, reporting bias).                        | 13-14 |
| Conclusions         | 26 | Provide a general interpretation of the results in the context of other evidence, and implications for future research.                                                              | 14-15 |
| <b>FUNDING</b>      |    |                                                                                                                                                                                      |       |
| Funding             | 27 | Describe sources of funding for the systematic review and other support (e.g., supply of data); role of funders for the systematic review.                                           | 15    |
